# Supplementary material
Source: Springer Nature journal article supplement (https://www.springermedizin.de/resource/supplementary/12876_2008_429_MOESM4_ESM.pdf/9436990)

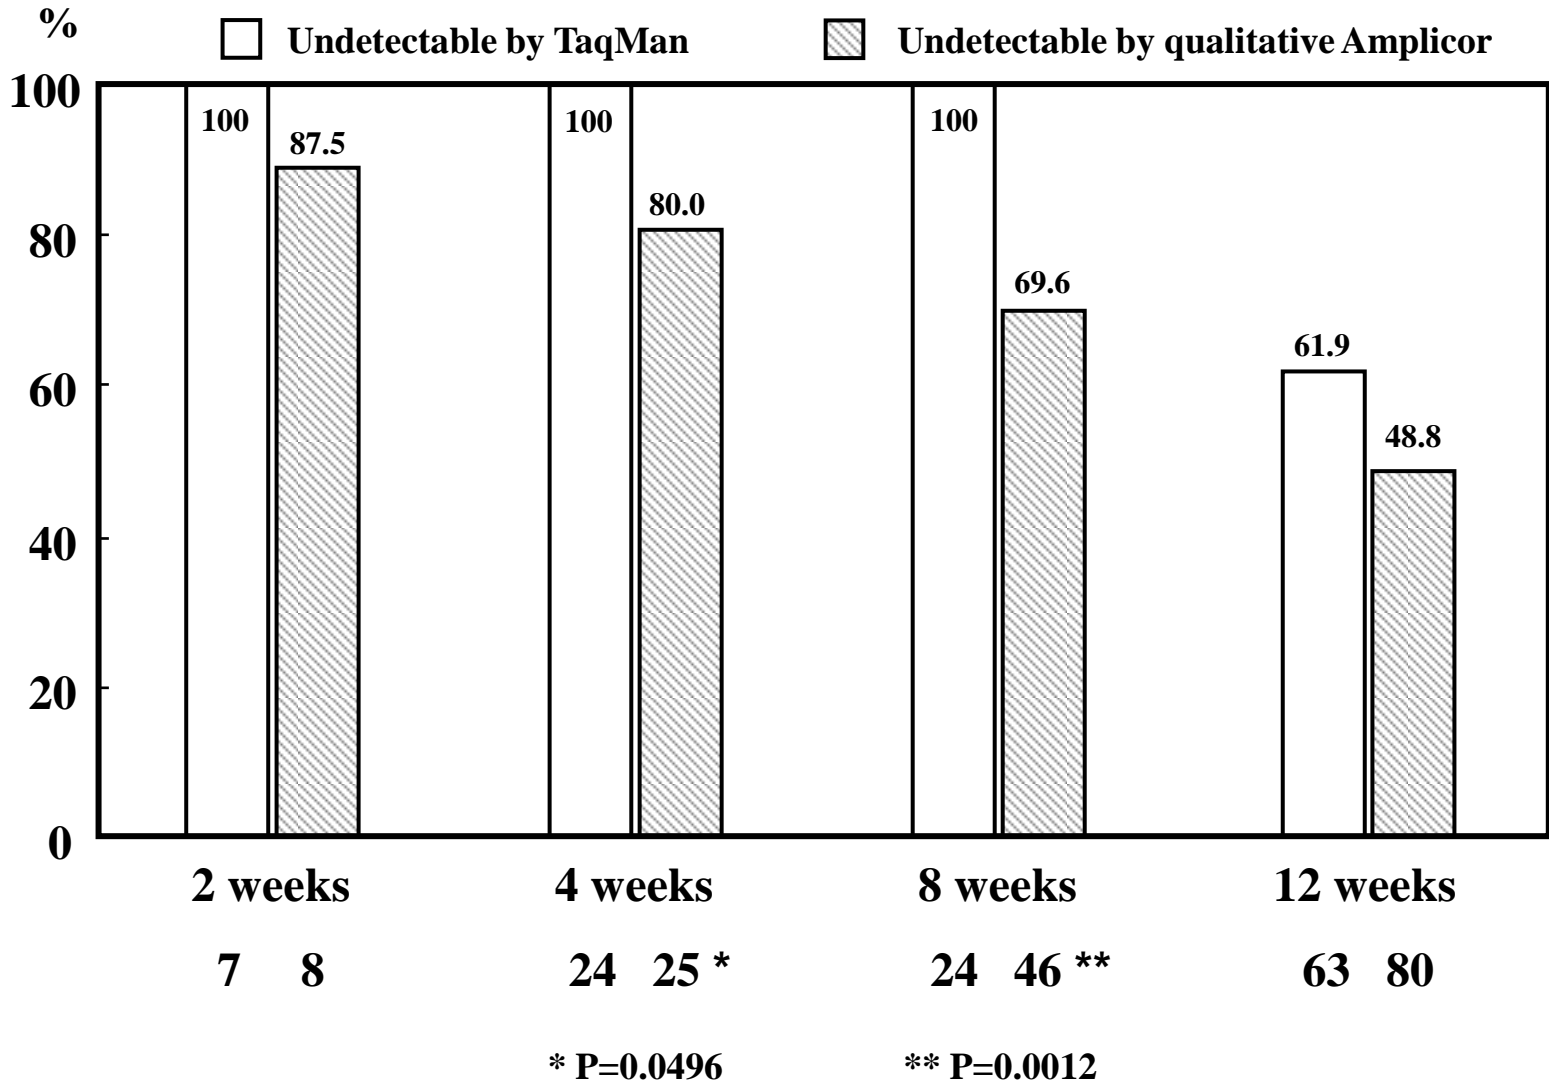

Supplement: MOESM4 [file 9436990]
